1 **Structure-based alignment of human caspase recruitment domains provides a framework for**  
2 **understanding their function**

3 **Joseph P. Boyle<sup>1</sup> and Tom P. Monie<sup>1,2</sup>**

4 **<sup>1</sup>Department of Veterinary Medicine, University of Cambridge, Cambridge, UK**

5 **<sup>2</sup>MRC Elsie Widdowson Laboratory, Cambridge, UK**

6 **Corresponding Author: Dr Tom P. Monie; Mailing address - MRC EWL, Elsie Widdowson**  
7 **Laboratory, 120 Fulbourn Road, Cambridge, CB1 9NL, UK; Email - [tpm22cam.ac.uk](mailto:tpm22cam.ac.uk); Telephone -**  
8 **+441223437665**

9 **Running title: Structure-based alignment of human CARDS**

10

11 **Abstract**

12 Intracellular signalling is driven by protein-protein interactions. Members of the Death Domain  
13 superfamily mediate protein-protein interactions in both cell death and innate immune signalling  
14 pathways. They drive the formation of macromolecular complexes that act as a scaffold for protein  
15 recruitment and downstream signal transduction. Death Domain family members have low  
16 sequence identity, complicating their identification and predictions of their structure and function.  
17 We have taken all known human caspase recruitment domains (CARDs), a subfamily of the Death  
18 Domain superfamily, and generated a structure-guided sequence alignment. This alignment has  
19 enabled the identification of 14 positions that define the hydrophobic core and present a template  
20 for the identification of novel CARD sequences. We identify a conserved salt bridge in over half of all  
21 human CARDs and find a subset of CARDs likely to be regulated by tyrosine phosphorylation in their  
22 type I interface. Our alignment highlights that the CARDs of NLRC3 and NLRC5 are likely to be  
23 pseudodomains that have lost some of their original functionality. Together these studies  
24 demonstrate the benefits of structure-guided sequence alignments in understanding protein  
25 functionality.

26

## 27 **Introduction**

28 The Death Domain protein superfamily contains a collection of helical protein domains that provide  
29 a central, and crucial, function in the formation of macro-molecular protein signalling complexes in  
30 both cell-death and immune signalling pathways. There are four members of the superfamily: the  
31 death domain (DD), the pyrin domain (PYD), the death effector domain (DED) and the caspase  
32 recruitment domain (CARD). Each of these protein domains folds into a helical bundle which is  
33 usually formed from six independent alpha helices (Kersse et al., 2011).

34 Most interactions between DD family members are homotypic in nature i.e. CARD with CARD. These  
35 interactions are mediated by discrete interfaces on the protein surface known as type I, II and III.  
36 Each of these interfaces consists of an 'a' and a 'b' component; one on each binding partner. For  
37 example, a Type I interaction involves the coming together of a Type Ia interface on one protein with  
38 a Type Ib interface on the other. The precise positioning of these interfaces means that potentially  
39 every DD-type fold involved in the complex can form six distinct interactions. It is this multiplicity of  
40 binding surfaces that helps to drive the formation of large signalling complexes such as the  
41 Myddosome (Lin et al., 2010; Motshwene et al., 2009) and Death Inducing Signalling Complex  
42 (Kischkel et al., 1995). Heterotypic interactions have been reported, but are not common. The first  
43 structure of a heterotypic DD interaction, between the CARD of RIPK2 (Receptor-Interacting Protein  
44 Kinase 2) and the DD of p75, has only recently been described (Lin et al., 2015). Interestingly, this  
45 complex was not formed by classical DD interfaces, suggesting that the heterotypic DD interactions  
46 may be somewhat more heterogeneous in nature.

47 Despite having very similar structures there is limited sequence similarity between, and even within,  
48 domain sub-families. Somewhat unusually it is not uncommon for two proteins in the same  
49 subfamily to have extremely similar tertiary structures, but possess less than 20% sequence identity.  
50 Consequently the identification of DD family members can be difficult, as can the reliable prediction  
51 of their secondary and tertiary structures.

52 Understanding how these protein domains interact is important for the potential modulation of  
53 signalling complexes involved in death and immune signalling networks. Amongst other functions  
54 the CARD plays an important role in the formation of the apoptosome (Cheng et al., 2016),  
55 recruitment of caspase-1 to the inflammasome (Guo et al., 2015), and propagation of signalling in  
56 the NOD1 (Bertin et al., 1999), NOD2 (Ogura et al., 2001), RIG-I and MDA-5 innate immune signalling  
57 pathways (Loo and Gale, 2011). In order to provide a framework by which we can better understand  
58 the functional diversity of the CARD we generated a structure-based alignment of all known human  
59 CARDS. This alignment identifies a broadly conserved hydrophobic core which functions as a  
60 signature motif for CARDS, provides a basis for the generation of homology models of unsolved  
61 CARD structures, and suggests the CARDS of human and murine NLRC3 and NLRC5 are  
62 pseudodomains.

63

## 64 **Results and Discussion**

### 65 **Humans possess 36 CARD-containing and 4 partial/atypical CARD-containing proteins**

66 To better understand the molecular basis of CARD:CARD mediated signalling pathways we sought to  
67 generate and analyse an alignment of human CARDS at the amino acid level. Sequence identification  
68 and retrieval began with the human PFAM collection (**PF00619**) which lists 121 human CARD-  
69 containing sequences, of which 29 are unique (Supplementary Table 1). By performing PSI-BLAST  
70 and jackhmmer searches with each of these unique sequences we expanded the collection of human  
71 CARDS to 36 through the addition of BINCA, CIITA, DLG5, MAVS, MDA-5 CARD1, NLRC3, RIG-I CARD1,  
72 RIG-I CARD2 and TNFRSF21 (Supplementary Table 1). None of PFAM, PSI-BLAST, or jackhmmer  
73 identified NLRC5 as a CARD-containing protein. However, the structure of the N-terminal domain of  
74 human NLRC5 has recently been solved (Gutte et al., 2014) and was classified as an atypical CARD.  
75 As such we added NLRC5 to our list of CARD-containing human proteins (Supplementary Table 1).  
76 Glutamine-Rich Protein 1 and NLRC3 were also labelled as partial CARDS because they do not appear

77 to contain Helix 1. The TNFRSF21 sequence appears to be similarly distantly related to other  
78 members of the death domain superfamily and so was also treated as an irregular CARD.  
79 Consequently this resulted in the retrieval of 36 CARDS and 4 atypical human CARDS (Supplementary  
80 Table 1).

### 81 **Structure-guided alignment identifies a hydrophobic core of the CARD**

82 Alignment of the CARD sequences was initially performed automatically using CLUSTALW2 (Larkin et  
83 al., 2007), CLUSTAL OMEGA (Sievers et al., 2011) and MUSCLE (Edgar, 2004). However, the outputs  
84 of these three programs were sufficiently different that we could not place any level of confidence in  
85 the accuracy of the alignment. In lieu of automatic alignment processes, we chose to use current  
86 structural information, available for 17 of the 36 typical CARDS (Supplementary Table 1), as a basis  
87 for the manual alignment of the human CARD sequences.

88 Initial comparative analysis of the available CARD structures indicated that the structures of Apaf-1,  
89 cIAP1, NLRP1, ASC and CARD8 could most easily be aligned due to the similar lengths of loops and  
90 insertions between their helices. The RAIDD CARD structure could be easily inserted into this  
91 alignment as its shorter helix 1 is complemented by an extended 1-2 loop (Figure 1A). As protein  
92 folding and stability is often driven by hydrophobic factors we determined which residues in our six  
93 aligned CARD structures composed the hydrophobic core of the domain. This identified 14 specific  
94 sites, all of which contained hydrophobic residues in each of the structures, and which we have  
95 labelled h1 to h14 (Figure 1B and C). Eleven of these residues are consistent with an earlier  
96 comparison of 11 different CARD structures, with residues h3, h8 and h13 representing an expansion  
97 to the defining hydrophobic of the CARD (Chen et al., 2013). Almost all of these conserved positions  
98 are positioned on the inside of amphipathic helices, however, residues h3 and h7 are part of the H1-  
99 H2 and H2-H3 loops respectively.

### 100 **Generation of a complete structure-based alignment of the human CARDS**

101 To generate a comprehensive structure-guided alignment of the human CARDS we sequentially  
102 compared the other known human CARD structures to this preliminary alignment. We began with  
103 the CARD of NOD1 which, consistent with other reports (Srimathi et al., 2008), immediately revealed  
104 a significant discrepancy between the first reported Nuclear Magnetic Resonance (NMR) structure of  
105 the NOD1 CARD (PDB 2B1W; (Manon et al., 2007)) and the subsequent crystal (PDBs: 4E9M, 2NZ7,  
106 2NSN) and NMR structures (PDB: 2DBD) (Figure 2A and B). The NOD1 crystal structures exhibit a  
107 potentially non-physiological dimerisation involving helix swapping and so the most recent NMR  
108 structure of monomeric NOD1 (PDB: 2DBD) was used for alignment. NOD1 showed a two-residue  
109 insertion in the H5-H6 loop and a tilt in the orientation of helix 6 when compared to our six core  
110 structures (Figure 2C and D).

111 The assembly of our structure-based human CARD alignment was continued by the sequential  
112 manual addition of all the remaining available human CARD structures. This led to a number of  
113 minor modifications to the original alignment in order to incorporate the presence of additional  
114 insertions and deletions in the CARD sequences. CARD18 (also known as ICEBERG; PDB: 1DGN) for  
115 example, contains slightly extended H1-H2 and H3-H4 loops, whilst CARD11 shares a deletion in the  
116 H1-H2 loop with Apaf-1, but has an additional four residues in its H3-H4 loop (Figure 3). Caspase-9  
117 (PDB: 4RHW) also possesses an insertion in the H3-H4 loop, but it is only two residues long (Figure  
118 3). MAVS (PDB: 2VGQ) showed single residue deletions in two locations in the H1-H2 loop and also  
119 another in helix 5, as well as a three residue deletion at the end of helix 2 and a single residue  
120 insertion analogous to Apaf-1 in the final helix. It also had a three residue insertion in the H3-H4  
121 loop. These elements were broadly similar to those seen in the two CARDS of RIG-I (PDB: 4P4H)  
122 except that in these instances the helix 2 deletion was only two residues long and the insertion in  
123 the H3-H4 loop for the first RIG-I CARD only contained two residues. The CARD of BINCA (PDB:  
124 4DWN) showed four different insertions relative to the original alignment which served to extend  
125 the H1-H2 loop; extend the start and end of helix 2; and resulted in the breaking of helix 3 and the  
126 related introduction of an extended H3-H4 loop (Figure 4). Helix 6 was unstructured in RIPK2 (PDB:

127 2N7Z) and missing in NOL3 (PDB: 4UZ0). In fact, overall helix 6 showed variability between CARDS in  
128 its length, its position relative to helices 1-5, and its contribution to the hydrophobic core. This  
129 suggests that it is helices 1-5 that provide the critical structural and biological functionality of the  
130 CARD family.

131 In total 17 different CARDS were used to generate a structure-guided alignment of the human CARD  
132 repertoire (Supplementary Figure 1). Aside from the absence of helix 6 in RIPK2 and NOL3 discussed  
133 above the hydrophobic core residues were conserved with the exception of residue h4. Despite  
134 pointing into the hydrophobic core this residue is a serine in the RIPK2 structure and a histidine in  
135 the Bcl-10 structure. This suggests that, at least in some positions, there is flexibility in the  
136 composition of these residues, though it remains to be determined whether there is any functional  
137 relevance to this variation. It should also be noted that the inherent structural variations in helix 6  
138 means that these conserved hydrophobic residues could not always be assigned with complete  
139 confidence, but there tended to always be two hydrophobic residues facing towards the protein  
140 core.

#### 141 **All typical human CARDS can be incorporated into the alignment**

142 Once all the human CARDS with solved structures had been aligned we added in the sequences of  
143 the remaining 19 human CARDS using the presence of the core hydrophobic residues as a primary  
144 guide for the alignment, complemented using the FUGUE fold recognition server. The resulting  
145 alignment can be seen in Figure 5. NLRC3, NLRC5, GRP1 and TNFRSF21 were not included in the  
146 alignment due to their extensive deviation from the classical CARD sequence and structure.

147 The majority of CARDS aligned well and could be fitted so that any insertions and deletions were  
148 placed outside of the likely helix positions while still fulfilling the requirement to create a  
149 hydrophobic core. Somewhat remarkably, the hydrophobic core identified in the preliminary  
150 alignment (Figure 1) showed a strong level of retention in all of the 36 CARD sequences contained in  
151 the final alignment (Figure 5). The final alignment is most reliable over the first five helices (marked

152 with numbers 1-5 in Figure 5) and for the conserved hydrophobic residues. The size of the inter-  
153 helical loops varies significantly between CARDS and is consequently more difficult to compare  
154 directly. The most likely hydrophobic residues for positions h13 and h14 are labelled in Helix 6 but  
155 structural information will be required to verify these in most cases. It has also been noted in  
156 previous studies (Hu et al., 2014) that the initiating methionine can contribute to the hydrophobic  
157 core, which suggests that the stability of recombinant constructs may benefit from beginning at the  
158 start of the protein sequence.

159 Analysis of the full CARD alignment identified a small number of notable deviations from the  
160 conservation of the hydrophobic core. These include: caspases-4 and -5 which both possess a lysine  
161 residue at position h8; Bcl-10 and RIPK2 which contain a histidine and a serine at position h4  
162 respectively; CIITA, which contains a serine at position h10; and the presence of a threonine at h5 for  
163 NLRC4 and the highly similar group of CARDS formed from CARD9, 10, 11 and 14. We know that  
164 RIPK2 (PDB: 2NZ7), Bcl-10 (PDB:2MB9) and CARD11 (PDB: 4LWD) still adopt a CARD-like structure  
165 despite these substitutions indicating that the h4 and h5 positions have at least some flexibility in  
166 terms of the biochemical properties of the residue situated there. It remains to be seen whether  
167 caspase-4 and caspase-5 also adopt the classical CARD fold or whether the presence of a large  
168 positively charged side chain results in structural distortion. Of course, it may well be that such  
169 structural distortion is necessary for the CARDS of caspase-4 and caspase-5 to be able to act as  
170 intracellular sensors of LPS (Shi et al., 2014).

#### 171 **Surface salt bridges are found in over half the CARDS**

172 Eight of the sixteen structures analysed possess a salt bridge between an aspartate or glutamate on  
173 Helix 2 and a lysine or arginine in the 4-5 loop (Figure 6A, B). The alignment in Figure 5 shows that a  
174 further 12 CARDS contain appropriately charged residues in these positions, suggesting that 20 of  
175 the human CARDS maintain this salt bridge.



176 It is plausible that these salt bridges may be important structurally and functionally. Certainly their  
177 potential formation needs to be considered when producing homology models and in the  
178 interpretation of site-directed mutagenesis data. The use of electron microscopy to study death  
179 domain filaments is becoming more common and in the absence of high-resolution monomeric  
180 structures models of these filaments are built using homology models of the individual domains. In a  
181 recent study (Lu et al., 2016) of the caspase-1 CARD filaments, homology models of the caspase-1  
182 CARD were constructed based on the structure of the closely related CARD from CARD18 (ICEBERG;  
183 PDB 1DGN). These were then docked to an electron density map and provided a basis for  
184 understanding caspase-1 filament assembly. This study could arguably be further improved by the  
185 inclusion of a salt bridge in these homology models. Figure 6C shows the significant differences in  
186 residue position and surface electrostatic potential of caspase-1 homology models which either  
187 maintain or break this salt bridge, changes which may influence functional interpretation.

#### 188 **Tyrosine phosphorylation in the type Ib interface**

189 Both RIPK2 (Tigno-Aranjuez et al., 2010) and ASC (Hara et al., 2013) undergo tyrosine  
190 phosphorylation on a residue in their Type Ib patch - Y474 (RIPK2 human numbering) and Y144 (ASC  
191 murine numbering). These phosphorylation events are reportedly crucial for function, though they  
192 have not yet been observed in structural studies. Our alignment indicates that the CARDS of four  
193 other proteins, CARD6, NLRP1, NOL3 and NOD2 CARD1 have a tyrosine residue in the same position  
194 as ASC and RIPK2 (Figure 7A, B), suggesting that their activity might be modulated in a similar way  
195 and that post-translational modification may be a common way of mediating complex formation and  
196 downstream signalling for these proteins.

197 The Type Ib patch in all six of these proteins also contains an aspartate residue and it may well be  
198 that tyrosine phosphorylation is necessary for the formation of a Type I interaction resembling that  
199 seen between caspase-9 and Apaf-1. In this instance positively charged and negatively charged  
200 surfaces interact around two key residues on each side (Qin et al., 1999). Further structural and

201 functional studies of CARD:CARD interactions may need to use expression systems other than *E. coli*  
202 in order to investigate the importance of these phosphorylation events.

### 203 **The CARDS from human and murine NLRC3 and NLRC5 are pseudodomains**

204 The structure of the N-terminus of murine NLRC5 has been solved by NMR. It forms an atypical CARD  
205 in that Helix 1a and Helix 6 are separated from the rest of the domain by extended loops and helix 3  
206 is completely unstructured. Alignment of the human and murine NLRC5 sequences, based on the  
207 murine structure, shows that while most hydrophobic residues are conserved in both species, h1,  
208 h5, h8 and h9 are non-hydrophobic. The orthologous region of zebrafish NLRC5 contains the  
209 expected hydrophobic residues in these regions and in general aligned more readily with other  
210 CARDS (Figure 8A).

211 NLRC3 was examined in a similar manner. The zebrafish contains many NLRC3-like genes and so the  
212 NLRC3 orthologue from the platypus was used for comparison instead. Fold recognition analysis of  
213 the human NLRC3 sequence with FUGUE suggests that whilst many of the conserved hydrophobic  
214 residues are present in the human protein five - h2, h6, h8, h12, h14 - appear to have been altered  
215 (Figure 8B). The same pattern is seen for murine NLRC3 in which h1, h2, h5, h6, h12 and h14 are all  
216 substituted. In contrast, the platypus orthologue contains all of the expected hydrophobic residues  
217 and also appears to have the surface salt bridge commonly found in CARDS (Figure 8B) which is  
218 absent in both the murine and human NLRC3 CARDS.

219 The sequence deviation of the human and murine NLRC3 and NLRC5 CARDS, along with the non-  
220 typical structure of murine NLRC5 CARD indicate that they have become pseudodomains in humans  
221 and mice and have most likely lost some of their original functionality. Little is known about the roles  
222 of the NLRC3 and NLRC5 CARD, but our alignment shows apparent degeneration of these CARDS in  
223 humans and mice compared to their orthologues from certain vertebrates. The future study of  
224 CARD-containing proteins using other species might take these differences into account when

225 drawing conclusions about protein function. It also suggests that too many substitutions in the  
226 hydrophobic core result in structural changes to the CARD fold. This has clear implications for  
227 downstream CARD function. This observation may have further implications for the CARDS of  
228 caspase-4 and caspase-5 which are substituted in the h1 and h8 positions and have uncertain helix 6  
229 alignments. A disrupted or altered structure may help explain why these domains function as  
230 intracellular LPS receptors rather than the usual homotypic interaction motifs and structural  
231 scaffolds.

### 232 **The hydrophobic core can be used for identifying potential novel CARDS**

233 Through use of PSI-BLAST and jackhmmer it is possible to find candidate CARDS in protein databases.  
234 However, the high sequence variability in the CARD superfamily can make these difficult to pick up  
235 on and confirm. One example from our search is Tetratricopeptide Repeat Domain 3 (TTC3), which  
236 came up as a low-confidence hit in multiple PSI-BLAST searches and was labelled as containing a  
237 possible CARD by FUGUE (Supplementary Table 1). The TTC3 sequence fits into the constraints of the  
238 conserved hydrophobic pattern (Figure 8C) and no other domains are predicted to overlap the CARD  
239 prediction, suggesting that it may indeed adopt a CARD-like fold, although of course ultimately  
240 structural confirmation will be required.

### 241 **Conclusion**

242 We have used a combination of structure-based and sequence-derived information to create a  
243 global alignment of the human CARD superfamily. Almost all human CARDS were predicted to  
244 contain a set of fourteen hydrophobic residues and half of these also maintain a surface salt bridge.  
245 Deviations were most common in helix 6 while some CARDS such as that from RIPK2 also had single  
246 position exceptions to the hydrophobic pattern. The atypical structure of NLRC5, which is missing  
247 three conserved residues, suggests that too many differences can significantly alter the CARD fold,  
248 leading us to suggest that the CARDS of human and murine NLRC3 and NLRC5 are likely to be

249 pseudodomains; whilst providing a potential explanation for the ability of the caspase-4 and -5  
250 CARDS to bind LPS

251 Our investigation highlights the potential importance of hydrophobic residues, salt bridges and  
252 phosphorylation sites as a resource for successful design and interpretation of bioinformatic and  
253 experimental studies on the CARD superfamily. In particular, homology modelling and site-directed  
254 mutagenesis efforts may benefit from these observations. For example consideration of the  
255 potential structural roles of charged surface residues may aid the choice and design of appropriate  
256 expression systems to allow post-translation modifications and the production of functional, soluble  
257 and stable protein. It is highly likely that such an approach is also applicable to the other protein  
258 folds in the Death Domain superfamily.

## 259 **Materials and Methods**

260 Fold identification and sequence alignments:

261 PSI-BLAST (<http://blast.ncbi.nlm.nih.gov/Blast.cgi>) (Altschul et al., 1997) and jackhmmer  
262 (<https://www.ebi.ac.uk/Tools/hmmer/search/jackhmmer>) (Finn et al., 2015) searches were  
263 performed using predicted CARD sequences from PFAM (Finn et al., 2016), extended by ten residues  
264 at both termini, as search terms (Supplementary Table 1). Each search was run to confluence with  
265 default settings. Fold recognition was performed using FUGUE  
266 (<http://mizuguchilab.org/fugue/prfsearch.html>) (Shi et al., 2001).

267 Automated sequence alignments of recovered CARD sequences were attempted using ClustalW2  
268 (<http://www.ebi.ac.uk/Tools/msa/clustalw2/>) (Larkin et al., 2007), Clustal OMEGA  
269 (<http://www.ebi.ac.uk/Tools/msa/clustalo/>) (Sievers et al., 2011) and MUSCLE  
270 (<http://www.ebi.ac.uk/Tools/msa/muscle/>) (Edgar, 2004) using default settings.

271 Structural alignment was performed using, where available, one representative structure for each  
272 CARD (Supplementary Table 1). Generally, structures were chosen based on the best available

273 resolution, though exceptions are detailed in the main text. Overlay and RMSD calculations were  
274 performed using either the “**super p1, p2**” command in PyMol (The PyMol Molecular Graphics  
275 System, Version 1.7.6.6 Schrödinger, LLC), where the first protein, p1, is superimposed onto the  
276 second protein, p2; or where the super command was not operational, “**super p1 & alt A+”, p2 & alt**  
277 **B+”** was used instead.

## 278 **Acknowledgements**

279 This work was supported by the Wellcome Trust (WT085090MA), the Medical Research Council  
280 (U105960399) and a BBSRC Doctoral Training Grant.

## 281 **References:**

- 282 Altschul, S.F., Madden, T.L., Schäffer, a a, Zhang, J., Zhang, Z., Miller, W., and Lipman, D.J. (1997).  
283 Gapped BLAST and PSI-BLAST: a new generation of protein database search programs. *Nucleic Acids*  
284 *Res.* *25*, 3389–3402.
- 285 Bertin, J., Nir, W.J., Fischer, C.M., Tayber, O. V, Errada, P.R., Grant, J.R., Keilty, J.J., Gosselin, M.L.,  
286 Robison, K.E., Wong, G.H., et al. (1999). Human CARD4 protein is a novel CED-4/Apaf-1 cell death  
287 family member that activates NF-kappaB. *J. Biol. Chem.* *274*, 12955–12958.
- 288 Chen, K.E., Richards, A. a, Caradoc-Davies, T.T., Vajjhala, P.R., Robin, G., Lua, L.H.L., Hill, J.M.,  
289 Schroder, K., Sweet, M.J., Kellie, S., et al. (2013). The structure of the caspase recruitment domain of  
290 BinCARD reveals that all three cysteines can be oxidized. *Acta Crystallogr. D. Biol. Crystallogr.* *69*,  
291 774–784.
- 292 Cheng, T.C., Hong, C., Akey, I. V, Yuan, S., and Akey, C.W. (2016). A near atomic structure of the  
293 active human apoptosome. *Elife* *5*, e17755.
- 294 Edgar, R.C. (2004). MUSCLE: multiple sequence alignment with high accuracy and high throughput.  
295 *Nucleic Acids Res.* *32*, 1792–1797.
- 296 Finn, R.D., Clements, J., Arndt, W., Miller, B.L., Wheeler, T.J., Schreiber, F., Bateman, A., and Eddy,  
297 S.R. (2015). HMMER web server: 2015 update. *Nucleic Acids Res.* *43*, W30-8.
- 298 Finn, R.D., Coghill, P., Eberhardt, R.Y., Eddy, S.R., Mistry, J., Mitchell, A.L., Potter, S.C., Punta, M.,  
299 Qureshi, M., Sangrador-Vegas, A., et al. (2016). The Pfam protein families database: towards a more  
300 sustainable future. *Nucleic Acids Res.* *44*, D279-85.
- 301 Guo, H., Callaway, J.B., and Ting, J.P.-Y. (2015). Inflammasomes: mechanism of action, role in  
302 disease, and therapeutics. *Nat. Med.* *21*, 677–687.
- 303 Gutte, P.G.M., Jurt, S., Grütter, M.G., and Zerbe, O. (2014). Unusual Structural Features Revealed by  
304 the Solution NMR Structure of the NLRC5 Caspase Recruitment Domain. *Biochemistry* *53*, 3106–  
305 3117.
- 306 Hara, H., Tsuchiya, K., Kawamura, I., Fang, R., Hernandez-Cuellar, E., Shen, Y., Mizuguchi, J.,

- 307 Schweighoffer, E., Tybulewicz, V., and Mitsuyama, M. (2013). Phosphorylation of the adaptor ASC  
308 acts as a molecular switch that controls the formation of speck-like aggregates and inflammasome  
309 activity. *Nat. Immunol.* *14*, 1247–1255.
- 310 Hu, Q., Wu, D., Chen, W., Yan, Z., Yan, C., He, T., Liang, Q., and Shi, Y. (2014). Molecular determinants  
311 of caspase-9 activation by the Apaf-1 apoptosome. *Proc. Natl. Acad. Sci.* *111*, 16254–16261.
- 312 Kersse, K., Verspurten, J., Vanden Berghe, T., and Vandenabeele, P. (2011). The death-fold  
313 superfamily of homotypic interaction motifs. *Trends Biochem. Sci.* *36*, 541–552.
- 314 Kischkel, F.C., Hellbardt, S., Behrmann, I., Germer, M., Pawlita, M., Krammer, P.H., and Peter, M.E.  
315 (1995). Cytotoxicity-dependent APO-1 (Fas/CD95)-associated proteins form a death-inducing  
316 signaling complex (DISC) with the receptor. *EMBO J.* *14*, 5579–5588.
- 317 Larkin, M.A., Blackshields, G., Brown, N.P., Chenna, R., McGettigan, P.A., McWilliam, H., Valentin, F.,  
318 Wallace, I.M., Wilm, A., Lopez, R., et al. (2007). Clustal W and Clustal X version 2.0. *Bioinformatics*  
319 *23*, 2947–2948.
- 320 Lin, S.C., Lo, Y.C., and Wu, H. (2010). Helical assembly in the MyD88-IRAK4-IRAK2 complex in TLR/IL-  
321 1R signalling. *Nature* *465*, 885–890.
- 322 Lin, Z., Tann, J.Y., Goh, E.T.H., Kelly, C., Lim, K.B., Gao, J.F., and Ibanez, C.F. (2015). Structural basis of  
323 death domain signaling in the p75 neurotrophin receptor. *Elife* *4*, e11692.
- 324 Loo, Y.-M., and Gale, M. (2011). Immune signaling by RIG-I-like receptors. *Immunity* *34*, 680–692.
- 325 Lu, A., Li, Y., Schmidt, F.I., Yin, Q., Chen, S., Fu, T.-M., Tong, A.B., Ploegh, H.L., Mao, Y., and Wu, H.  
326 (2016). Molecular basis of caspase-1 polymerization and its inhibition by a new capping mechanism.  
327 *Nat. Struct. Mol. Biol.* *23*, 416–425.
- 328 Manon, F., Favier, A., Núñez, G., Simorre, J.-P., and Cusack, S. (2007). Solution structure of NOD1  
329 CARD and mutational analysis of its interaction with the CARD of downstream kinase RICK. *J. Mol.*  
330 *Biol.* *365*, 160–174.
- 331 Motshwene, P.G., Moncrieffe, M.C., Grossmann, J.G., Kao, C., Ayaluru, M., Sandercock, A.M.,  
332 Robinson, C. V., Latz, E., and Gay, N.J. (2009). An oligomeric signaling platform formed by the Toll-like  
333 receptor signal transducers MyD88 and IRAK-4. *J. Biol. Chem.* *284*, 25404–25411.
- 334 Ogura, Y., Inohara, N., Benito, a, Chen, F.F., Yamaoka, S., and Nunez, G. (2001). Nod2, a Nod1/Apaf-1  
335 family member that is restricted to monocytes and activates NF-kappaB. *J. Biol. Chem.* *276*, 4812–  
336 4818.
- 337 Qin, H., Srinivasula, S.M., Wu, G., Fernandes-Alnemri, T., Alnemri, E.S., and Shi, Y. (1999). Structural  
338 basis of procaspase-9 recruitment by the apoptotic protease-activating factor 1. *Nature* *399*, 549–  
339 557.
- 340 Shi, J., Blundell, T.L., and Mizuguchi, K. (2001). FUGUE: sequence-structure homology recognition  
341 using environment-specific substitution tables and structure-dependent gap penalties. *J Mol Biol*  
342 *310*, 243–257.
- 343 Shi, J., Zhao, Y., Wang, Y., Gao, W., Ding, J., Li, P., Hu, L., and Shao, F. (2014). Inflammatory caspases  
344 are innate immune receptors for intracellular LPS. *Nature* *514*, 187–192.
- 345 Sievers, F., Wilm, A., Dineen, D., Gibson, T.J., Karplus, K., Li, W., Lopez, R., McWilliam, H., Remmert,  
346 M., Söding, J., et al. (2011). Fast, scalable generation of high-quality protein multiple sequence

347 alignments using Clustal Omega. *Mol. Syst. Biol.* 7, 539.

348 Srimathi, T., Robbins, S.L., Dubas, R.L., Hasegawa, M., Inohara, N., and Park, Y.C. (2008).  
349 Monomer/dimer transition of the caspase-recruitment domain of human Nod1. *Biochemistry* 47,  
350 1319–1325.

351 Tigno-Aranjuez, J.T., Asara, J.M., and Abbott, D.W. (2010). Inhibition of RIP2's tyrosine kinase activity  
352 limits NOD2-driven cytokine responses. *Genes Dev.* 24, 2666–2677.

353

#### 354 **Figure Legends:**

355 **Figure 1: Alignment of CARD structures identifies a hydrophobic core.** (A) Ribbon diagram of the  
356 superposition of the structures of Apaf-1 (PDB: 3YGS), cIAP1 (PDB: 2L9M), NLRP1 (PDB: 3KAT), ASC  
357 (PDB: 2KN6), CARD8 (PDB: 4IKM), and RAIDD (PDB: 3CRD). All sequences are coloured from blue at  
358 the N-terminus to red at the C-terminus. Individual helices are labelled and the greatest structural  
359 and spatial divergence is seen in helix 6. (B) Residues composing the hydrophobic core (coloured red,  
360 stick representation) of the CARD are plotted on the structure of the Apaf-I CARD (PDB: 3YGS). The  
361 right hand image uses a mesh to provide a spatial representation of the hydrophobic core. Individual  
362 helices are labelled. (C) Structure-based sequence alignment of six CARDS with highly similar overall  
363 structures. The positions of the residues contributing to the hydrophobic core are marked in red,  
364 bold and underlined, and labelled h1 to h14. The position of the six helices in the Apaf-I CARD is  
365 denoted below the sequence alignment.

366 **Figure 2: Comparison of Five NOD1 CARD Structures.** (A) Superposition of the C $\alpha$  backbone of  
367 helices 1-5 of the NOD1 CARD. The crystallographic NOD1 structures (PDBs: 4E9M, 2NZ7, 2NSN) and  
368 the NMR structure (PDB: 2DBD) are shown in grey. The original NMR structure (PDB: 2B1W) is shown  
369 in red. (B) Pairwise RMSD ( $\text{\AA}$ ) values for the superpositions of the NOD1 CARD structures shown in A.  
370 The upper triangle represents the RMSD of the full length CARDS, the lower triangle denotes the  
371 RMSD from just helices 2-5. The RMSD values for alignment against 2B1W are marked in red. (C)  
372 Alignment of the C-terminus of the NOD1 CARD with the initial six aligned structures. The insertion  
373 in the H5-H6 loop is highlighted in cyan. (D) Overlay of the NOD1 structure (red; PDB: 2DBD) with

374 that of Apaf-1 (light grey; PDB: 3YGS) and cIAP1 (light grey; PDB: 2L9M) highlighting the structural  
375 impact of the extended H5-H6 loop (denoted by an arrow).

376 **Figure 3: Extension of the H3-H4 loop in the Caspase-9 and CARD11 CARDS.** Overlay of helix 3 (H3),  
377 the H3-H4 loop, and helix 4 (H4) from the CARDS of Apaf-1, caspase-9 and CARD11. The H3-H4 loops  
378 are coloured as follows: Apaf-I (yellow), caspase-9 (orange), and CARD11 (red).

379 **Figure 4: BINCARD contains insertions in the N-terminal half of its CARD.** Superposition of the  
380 CARDS of Apaf-I (silver) and BINCARD (gold). Residues in BINCARD corresponding to the insertions in  
381 loops H1-H2, H2-H3 and H3-H4, as well as the extension of the N-terminus of Helix 2 are coloured  
382 blue and presented as sticks. The conserved hydrophobic position in the H1-H2 loop is coloured red.  
383 In the sequence alignment all core hydrophobic positions are coloured red and highlighted in bold  
384 and underlined. The gaps in Apaf-1 resulting from the BINCARD insertions are highlighted in cyan.

385 **Figure 5: Alignment of 36 Human CARDS.** Conserved hydrophobic residues, h1 - h14, are highlighted  
386 in yellow where known or predicted to be present in a sequence. Numbers underneath the  
387 alignment denote the positions of the six CARD helices. PDB codes used in the alignment for human  
388 CARDS are shown in brackets.

389 **Figure 6: Many CARDS form a salt bridge between Helix 3 and the 4-5 Loop.** (A) Eight of the  
390 currently available CARD structures contain a salt bridge between an acidic residue on Helix 3  
391 (orange) and a basic residue in the 4-5 loop (blue). Conserved hydrophobic residues are shown in red  
392 and cover positions h8, h9 and h10. (B) Superposition of the eight CARD structures from the  
393 alignment in panel (A) with their salt bridges coloured. (C) Comparison of the positions of the CARD  
394 salt bridge from ICEBERG with the homology model of caspase-1 from 5FNA and a homology model  
395 based on our alignment.

396 **Figure 7: A tyrosine residue is found in the Type Ib patch of six human CARDS.** (A) Alignment of six  
397 CARD sequences with the putatively phosphorylated tyrosine shown in blue. Conserved hydrophobic



398 residues are shown in red and represent positions h7 and h8. (B) Overlay of four solved structures  
399 with tyrosines in the Type Ib patch.

400 **Figure 8: Human orthologues of NLRC5 and NLRC3 conform poorly to the conserved hydrophobic**  
401 **pattern.** (A) Alignment of human, mouse and zebrafish NLRC5 orthologues with other CARDs. (B)  
402 Alignment of human, mouse and platypus NLRC3 orthologues with other CARDs. (C) The putative  
403 CARD-containing protein TT3 shows conservation of the CARD hydrophobic core. In all panels  
404 residues contributing to the hydrophobic core are coloured red and presented in bold underlined  
405 text. Residues deviating from the hydrophobic core are light blue, bold and underlined. In panel B  
406 residues in the correct position to form a surface salt bridge are coloured orange (acidic), dark blue  
407 (basic) or purple (incompatible).

408

409 **Supplementary Tables and Figures:**

410 **Supplementary Table 1 - Summary of Human CARDs used in this study.** Underlined proteins were  
411 found in the original Pfam database search. Proteins marked in italics are reported to possess either  
412 incomplete or irregular CARDs. PDB identifiers are only provided for human structures and those in  
413 bold are crystal structures, those in standard case are NMR structures. For structures that were part  
414 of a complex the relevant chain identifier is provided in parentheses.

415 **Supplementary Figure 1: Final alignment of the 17 CARD structures available from the PDB.** PDB  
416 identifiers for each structure are provided in brackets. Hydrophobic residues are highlighted yellow  
417 and numbered above the alignment. Helix position as per the Apaf-1 structure, PDB 1CY5, are  
418 marked by numbers below the alignment

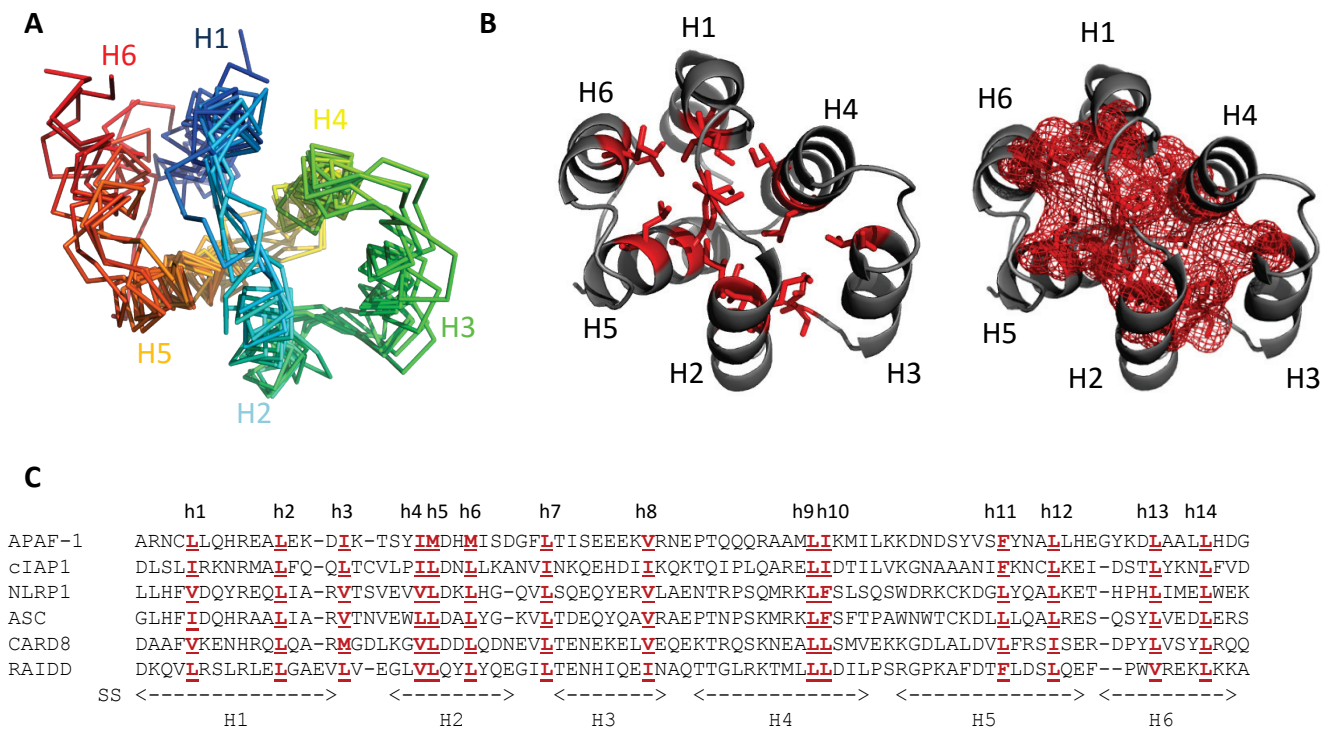

**Figure 1: Alignment of CARD structures identifies a hydrophobic core. (A)** Ribbon diagram of the superposition of the structures of Apaf-1 (PDB: 3YGS), cIAP1 (PDB: 2L9M), NLRP1 (PDB: 3KAT), ASC (PDB: 2KN6), CARD8 (PDB: 4IKM), and RAIDD (PDB: 3CRD). All sequences are coloured from blue at the N-terminus to red at the C-terminus. Individual helices are labelled and the greatest structural and spatial divergence is seen in helix 6. **(B)** Residues composing the hydrophobic core (coloured red, stick representation) of the CARD are plotted on the structure of the Apaf-1 CARD (PDB: 3YGS). The right hand image uses a mesh to provide a spatial representation of the hydrophobic core. Individual helices are labelled. **(C)** Structure-based sequence alignment of six CARDS with highly similar overall structures. The positions of the residues contributing to the hydrophobic core are marked in red, bold and underlined, and labelled h1 to h14. The position of the six helices in the Apaf-1 CARD is denoted below the sequence alignment.

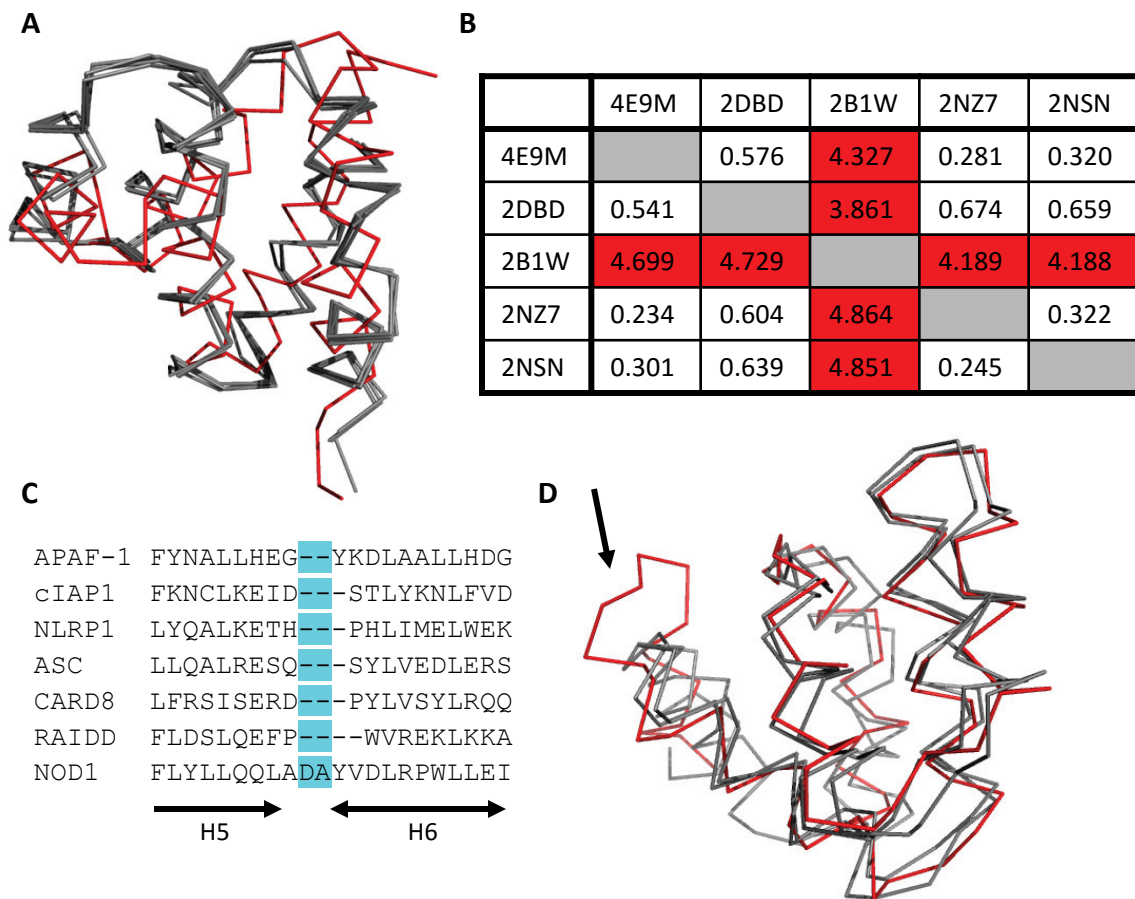

**Figure 2: Comparison of Five NOD1 CARD Structures.** (A) Superposition of the C $\alpha$  backbone of helices 1-5 of the NOD1 CARD. The crystallographic NOD1 structures (PDBs: 4E9M, 2NZ7, 2NSN) and the NMR structure (PDB: 2DBD) are shown in grey. The original NMR structure (PDB: 2B1W) is shown in red. (B) Pairwise RMSD ( $\text{\AA}$ ) values for the superpositions of the NOD1 CARD structures shown in A. The upper triangle represents the RMSD of the full length CARDS, the lower triangle denotes the RMSD from just helices 2-5. The RMSD values for alignment against 2B1W are marked in red. (C) Alignment of the C-terminus of the NOD1 CARD with the initial six aligned structures. The insertion in the H5-H6 loop is highlighted in cyan. (D) Overlay of the NOD1 structure (red; PDB: 2DBD) with that of Apaf-1 (light grey; PDB: 3YGS) and cIAP1 (light grey; PDB: 2L9M) highlighting the structural impact of the extended H5-H6 loop (denoted by an arrow).

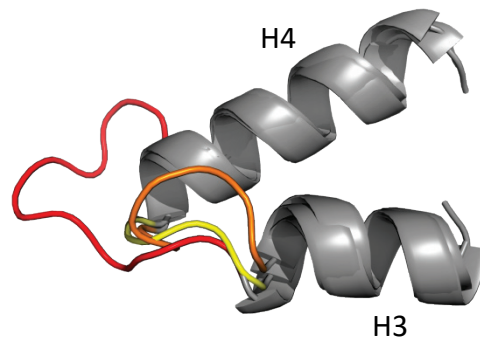

**Figure 3: Extension of the H3-H4 loop in the Caspase-9 and CARD11 CARDs.** Overlay of helix 3 (H3), the H3-H4 loop, and helix 4 (H4) from the CARDs of Apaf-1, caspase-9 and CARD11. The H3-H4 loops are coloured as follows: Apaf-I (yellow), caspase-9 (orange), and CARD11 (red).

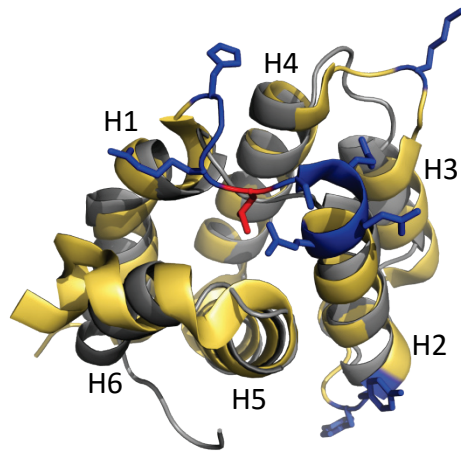

```

BINCA  YCDRLVQDTPFLTGHGRLSEQQVDRIILQLNRYYPQILTNKEAEKFRNPKASLRVRLCDLLSHLQRSGERDCQEFYRALYIH-AQPLHSRLPSRH
APAF-1 ARNCLLQHREALEKD--I--KTSYIMDHMIS--DGFLTISEEKVRNE-PTQQRAAMLIKMILKKNDSYVSFYNALLHEGYKDLAALLHDG
  
```

**Figure 4: BINCARD contains insertions in the N-terminal half of its CARD.** Superposition of the CARDS of Apaf-1 (silver) and BINCARD (gold). Residues in BINCARD corresponding to the insertions in loops H1-H2, H2-H3 and H3-H4, as well as the extension of the N-terminus of Helix 2 are coloured blue and presented as sticks. The conserved hydrophobic position in the H1-H2 loop is coloured red. In the sequence alignment all core hydrophobic positions are coloured red and highlighted in bold and underlined. The gaps in Apaf-1 resulting from the BINCARD insertions are highlighted in cyan.

**Full Alignment:**

|                    |              |       |          |              |              |            |              |            |            |          |            |             |              |
|--------------------|--------------|-------|----------|--------------|--------------|------------|--------------|------------|------------|----------|------------|-------------|--------------|
|                    | 1            | 2     | 3        | 45           | 6            | 7          | 8            | 910        | 11         | 12       | 13         | 14          |              |
| APAF-1 (1CY5)      | ARNCLLQHREAL | EK--D | LK-----  | TSYIMDHMIS-- | DGFLTISEEEKV | RNEPTQQ--- | QRAAMLIKMILK | KDN--DSYV  | SFYNALLHEG | ----     | YKDLAALL   | HDGIP---    |              |
| ASC (2KN6)         | GLHFTDQHRAAL | IA--R | VTN----- | VEWLLDALYG-- | KVLTDEQYQAV  | RAEPTNP--- | SKMRKLF      | SFTPAWNW-- | TCKDLLLQAL | RES----  | QSYLVED    | ERS----     |              |
| Bc1-10 (2MB9)      | KKDALENLRVYL | CE--K | II-----  | AERHFHDLRA-- | KKILSR       | EDTREI     | SCR          | TSSR---    | KRAGKLLDYL | QENP---  | KGLDTL     | VESIRREK--- |              |
| BINCA (4DWN)       | YCDRLVQDTPFL | TGHGR | LSEQQ--- | VDRILQLNRY   | YPQILTNK     | EAEKFR     | PNKASLR--    | VRLCDLLSHL | QRSGE--    | RDCQEFY  | RALYIH---- | AQPLHSR     | LPSRH----    |
| CARD6              | PSEIIRERKKLL | E--L  | LQHD---- | PDSILD       | TLTS--       | RRLISEE    | EYETL        | ENVTDLL--  | KKSRKLL    | ILVQK    | GE--       | ATCQH       | FLKCLFSTF--- |
| CARD8 (4IKM)       | DAAFVKENHRQL | QA--R | MGD----  | LKGVLLD      | LQD--        | NEVLT      | TENEKEL      | VEQEKTRQ-- | SKNEALL    | SMVEK    | KGD--      | LALDV       | LFRSISER---- |
| CARD9              | CWSVLEGF     | RVT   | LTS--    | VLD-----     | PSRITPYLRQ-- | CKVLN      | PDDEEQ       | VSDPNLV    | IRKRV      | GVLLD    | LILQ       | RTGH--      | KGYVAF       |
| CARD10             | LWERIEGVRHRL | AR--A | LN-----  | PAKLTPYLRQ-- | CRVIDE       | QDEE       | VSTYR        | FPCR       | VNRT       | GR       | LDIL       | RCRGK--     | RGYEA        |
| CARD11 (4LWD)      | LWENVECN     | RHML  | SR--     | YIN-----     | PAKLTPYLRQ-- | CKVIDE     | QDEE         | VLNAP      | MPLSK      | INRAG    | RLD        | LILHT       | KGQ--        |
| CARD14             | LWEMMESH     | RHRI  | VR--     | CIC-----     | PSRLTPYLRQ-- | AKVLC      | QLDEE        | VLHSP      | RLTNS      | AMRAG    | HL         | DL          | LKTRGK--     |
| CARD16             | ADKVLKEK     | RKLF  | IH--     | SM           | GEGT---      | INGLL      | DELLQ--      | TRVLN      | QEE        | MEK      | VKRE       | NATVM--     | DKTRAL       |
| CARD17             | ADKVLKEK     | RKQF  | IR--     | SV           | GEGT---      | INGLL      | GELLE--      | TRVLS      | QEE        | EIEI     | VKCE       | NATVM--     | DKARAL       |
| CARD18 (1DGN)      | ADQLLRK      | KRRI  | FH--     | SV           | GAGT---      | INALL      | DCLLE--      | DEVIS      | QED        | MNKV     | RDE        | NTVM--      | DKARV        |
| Caspase-1          | ADKVLKEK     | RKLF  | IR--     | SM           | GEGT---      | INGLL      | DELLQ--      | TRVLN      | QEE        | MEK      | VKRE       | NATVM--     | DKTRAL       |
| Caspase-2          | HQETL        | KKNRV | VLAQ     | -L           | L-----       | SELLE      | EHLLE--      | KDIT       | TLEM       | REL      | QAK        | VSF---      | SQNV         |
| Caspase-4          | AEGNHR       | KKPL  | KVLE--   | SL           | GKDF---      | LTGV       | LDN          | LVE--      | QNV        | LNW      | KEE        | EKKY        | YDTKIE--     |
| Caspase-5          | KKDNH        | KKK   | TVK      | MLE--        | YL           | GKDV---    | LHG          | VFN        | LAK--      | HDV      | LT         | LKEE        | EKKY         |
| Caspase-9 (4RHW)   | DRRLR        | RCLR  | L        | VE--         | EL           | Q-----     | VQL          | WD         | ALLS--     | RELF     | R          | PHM         | IEDI         |
| Caspase-12         | DEKPS        | NGVL  | VHM      | VK--         | LL           | I          | KTF---       | LDG        | I          | F        | D          | LME--       | NNV          |
| CIAP1 (3T6P)       | DLSLIR       | KNR   | MAL      | FQ--         | QL           | T-----     | VLP          | I          | LD         | N        | LK--       | ANV         | I            |
| CIAP2              | DLLLIR       | KNR   | MAL      | FQ--         | HL           | T-----     | VIP          | I          | L          | D        | S          | L           | L            |
| CIITA              | FQAIL        | TQV   | RML      | SS--         | HQ           | P          | S            | L---       | VQ         | A        | L          | D           | N            |
| DLG5               | RRELLA       | QCQ   | SLA      | Q--          | AM           | T-----     | VEA          | V          | L          | G        | L          | L           | E            |
| MAVS (2VGQ)        | TYKYIC       | RNF   | SNF      | C--          | INV          | D-----     | VVE          | I          | L          | P        | Y          | L---        | PCL          |
| MDA-5_CARD1        | FRYLIS       | C     | FRAR     | V            | KM--         | Y          | T            | Q---       | VE         | P        | V          | L           | D            |
| MDA-5_CARD2        | YLQLL        | N     | L        | QPT          | L            | V          | D--          | K          | L          | L---     | VR         | D           | V            |
| NLRC4              | -MNF         | I     | K        | D            | N            | S          | R            | L          | I          | Q--      | R          | M           | G            |
| NLRP1 (4IFP)       | -LHF         | V     | D        | Q            | R            | E          | L            | I          | A--        | R        | V          | T           | S---         |
| NOD1 (2DBD)        | HIQLL        | K     | S        | N            | R            | E          | L            | L          | V          | T--      | H          | R           | N---         |
| NOD2_CARD1         | SQEA         | F     | Q        | A            | R            | S          | Q            | L          | V          | E--      | L          | L           | V            |
| NOD2_CARD2         | PARDL        | Q     | S        | R            | P            | A          | I            | V          | R--        | R        | L          | H           | S---         |
| NOL3 (4UZ0)        | PSETI        | D     | R        | E            | R            | K          | L            | V          | E--        | T        | L          | Q           | A            |
| RAIDD (3CRD)       | DKQV         | L     | R        | S            | L            | R          | L            | E          | L          | G        | A          | E--         | V            |
| RIG-I_CARD1 (4P4H) | QRRSL        | Q     | A        | F            | Q            | D          | I            | R          | K--        | T        | L          | D---        | P            |
| RIG-I_CARD2 (4P4H) | YRLL         | L     | K        | R            | L            | Q          | P            | E          | F          | K        | T--        | R           | I            |
| RIP2 (2N7Z)        | AQQW         | I     | Q        | S            | K            | R          | E            | D          | I          | V        | N--        | Q           | M            |
|                    | 1111111111   | bb    |          | 22222        |              | tt33333333 |              | 44444444   |            | 55555555 |            | 66666       |              |

**Figure 5: Alignment of 36 Human CARDs.** Conserved hydrophobic residues, h1 - h14, are highlighted in yellow where known or predicted to be present in a sequence.

Numbers underneath the alignment denote the positions of the six CARD helices. PDB codes used in the alignment for human CARDs are shown in brackets.

A

|               |                                                                                |
|---------------|--------------------------------------------------------------------------------|
| APAF-1 (1CY5) | IS <u>E</u> EEK <u>V</u> RNEPTQQ---QRAAM <u>L</u> I <u>K</u> MILK <u>K</u> DN  |
| CARD11 (4LWD) | EQ <u>D</u> EDE <u>V</u> LNAPMLPSKINRAGR <u>L</u> L <u>D</u> ILHT <u>K</u> GQ  |
| CARD8 (4IKM)  | EN <u>E</u> KEL <u>V</u> EQEKTRQ---SKNEA <u>L</u> L <u>S</u> MVEK <u>K</u> GD  |
| CARD18 (1DGN) | QE <u>D</u> MNK <u>V</u> RDENDTVM--DKARV <u>L</u> I <u>D</u> LVTG <u>K</u> GPF |
| CIAP1 (3T6P)  | KQ <u>E</u> HDI <u>I</u> KQKTQIP---LQARE <u>L</u> L <u>D</u> TILV <u>K</u> GN  |
| MAVS (2VGQ)   | AR <u>D</u> QDR <u>L</u> RATCTLSGNRDTLWH <u>L</u> E <u>N</u> TLQ <u>R</u> PG   |
| NOD1 (2DBD)   | AE <u>D</u> AEI <u>V</u> CACPTQP---DKVRK <u>L</u> L <u>D</u> LVQ <u>S</u> KGE  |
| NOL3 (4UZ0)   | GP <u>E</u> YEA <u>L</u> DALPDAE---RRVRR <u>L</u> L <u>L</u> VQ <u>G</u> KGE   |

B

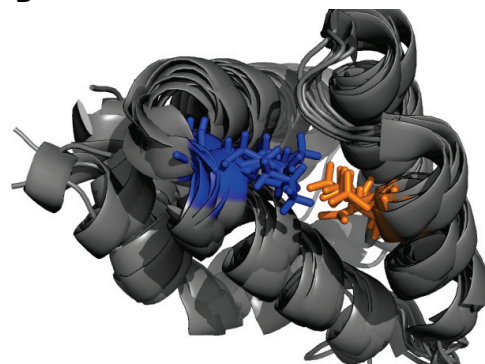

C

1DGN

5FNA

Alignment Model

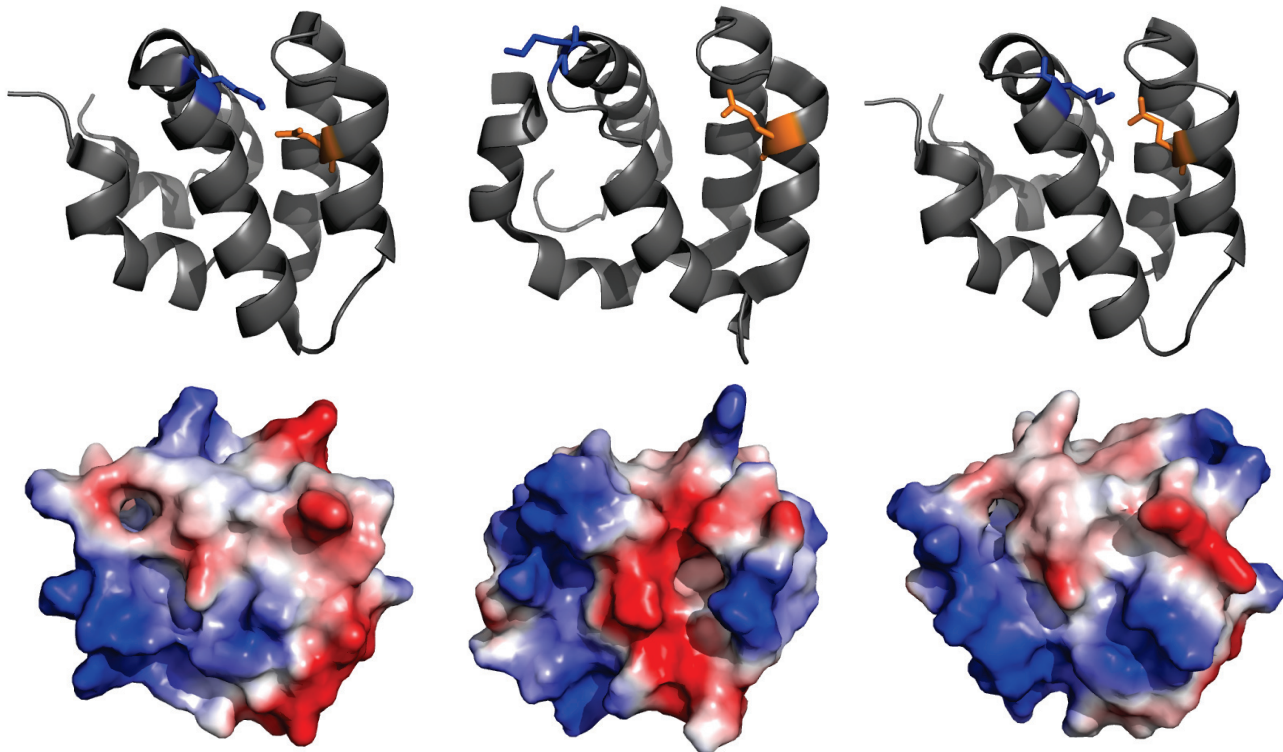

**Figure 6: Many CARDS form a salt bridge between Helix 3 and the 4-5 Loop.** (A) Eight of the currently available CARD structures contain a salt bridge between an acidic residue on Helix 3 (orange) and a basic residue in the 4-5 loop (blue). Conserved hydrophobic residues are shown in red and cover positions h8, h9 and h10. (B) Superposition of the eight CARD structures from the alignment in panel (A) with their salt bridges coloured. (C) Comparison of the positions of the CARD salt bridge from ICEBERG with the homology model of caspase-1 from 5FNA and a homology model based on our alignment.



**A**

|              |                                               |
|--------------|-----------------------------------------------|
| ASC (2KN6)   | KV <u>L</u> TDEQ <u>Y</u> QAVRAEPTNP          |
| NLRP1 (4IFP) | QV <u>L</u> SQEQ <u>Y</u> ERVLAENTRP          |
| RIP2 (2N7Z)  | DL <u>I</u> MKED <u>Y</u> ELVSTKPTRT          |
| NOL3 (4UZ0)  | GV <u>L</u> TGPE <u>Y</u> EALDALPDAE          |
| NOD2_CARD1   | EV <u>L</u> SWED <u>Y</u> EGFHLLGQPL          |
| CARD6        | RL <u>I</u> SEEE <u>Y</u> ET <u>L</u> ENVTDLL |

**B**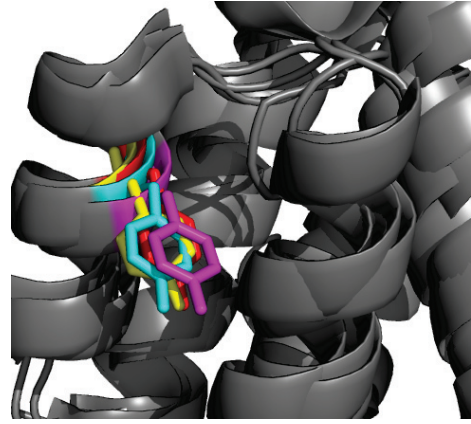

**Figure 7: A tyrosine residue is found in the Type Ib patch of six human CARDS.** (A) Alignment of six CARD sequences with the putatively phosphorylated tyrosine shown in blue. Conserved hydrophobic residues are shown in red and represent positions h7 and h8. (B) Overlay of four solved structures with tyrosines in the Type Ib patch.

**A**

```

CARD11 (4LWD)      -ALWENVECNRHMLSRIN--PAKLTPPYLRQCKVIDEQDEDEVLNAPMLPSKINRAGRLLDILHTKGQRGYVVFLESLEFY---YPELYKLVTGKE---
CARD8 (4IKM)      --DAAFVKENHRQLQARMGD--LKGVLDDLQDNEVLTENEKELVEQEKTRQ---SKNEALLSMVEKKGDLALDVLFRSISER---DPYLVSYLRQQNL---
MAVS (2VGQ)      DKTYKYICRNFSNFC--NVD--VVEILPYL---PCLTARDQDRLRATCTLSGNRDTLWHLFNTLQRRP--GWVEYFIAALRGCE--LVDLADEVASVYQ---
NOD1 (2DBD)      HPHIQLLKSNRELLVTHIRN--TQCLVDNLLKNDYFSAEDAEIVCACPTQP---DKVRKLLDLVQSKGEEVSEFFLYLQQLADAYVDLRPWLLEIGF---
APAF-1 (1CY5)    AKARNCLLQHREALEKDIK--TSYIMDHMISDGFLTISEEEKVRNEPTQQ---QRAAMLIKMILKKDNSYVSFYNALLHEG--YKDLAALLHDGIP---
NLRC5_Mouse (2MJM) ESIRLNENLWAWLVRLLSKNPEWLSAKLR--SFLPTMDLDCSYEPSNPE---VIHRQLNRLFAQGMATWKSFINDLCFE--LDVPLDMEIPLVSIWGP
NLRC5_Human      VGLQLGNKNLWSCLVRLLTKDPEWLNAKMK--FFLPNTDLDSRNETLDPE---QRVILQLNKLHVQGSDTWQSFIHCVCMQ--LEVPLDLEVLLLSTFGY
NLRC5_Zebrafish  GDALTLVAQEASVLVDLCEQDSSVLDHIF--DLLESNTQDEIRSLINNR---DRVSAIVDYFKTSDNITCRKFFCTIYEY---CKDIPFYLETTL---

```

**B**

```

CARD11 (4LWD)      -ALWENVECNRHMLSRIN--PAKLTPPYLRQCKVIDEQDEDEVLNAPMLPSKINRAGRLLDILHTKGQRGYVVFLESLEFY-YPELYKLVTGKE--
CARD8 (4IKM)      --DAAFVKENHRQLQARMGD--LKGVLDDLQDNEVLTENEKELVEQEKTRQ---SKNEALLSMVEKKGDLALDVLFRSISER--DPYLVSYLRQQNL--
MAVS (2VGQ)      DKTYKYICRNFSNFC--NVD--VVEILPYL---PCLTARDQDRLRATCTLSGNRDTLWHLFNTLQRRP--GWVEYFIAALRGCELVDLADEVASVYQ--
APAF-1 (1CY5)    AKARNCLLQHREALEKDIK--TSYIMDHMISDGFLTISEEEKVRNEPTQQ---QRAAMLIKMILKKDNSYVSFYNALLHEGKDLAALLHDGIP--
CARD18 (1DGN)    --ADQLLRKKRRIFIHSVGAGTINALLDCLLEDEVISQEDMNKVRDENDTVM--DKARVLIDLVTGKGPKSCCKFIKHLCEE--DPQLASKMGLH---
NLRC3_Human      --PGRLLDGHGRQQVQALSQLLEVIPDSMRKQEVRTGREAQGHGTGSPA--EQVKALMDLLAGKGSQGSHAQALDRTP--DAPLGPCSNDS---
NLRC3_Mouse      PWQEGDNIGSPGSVLALYSQLLANTDSTRKQEVWTDRETCLAYSVGSPA--EQVKALVDLLAGKGSQ---LLQVRDKMP--DSPLGSQSNES---
NLRC3_Platypus   --PGSWLQRHQKQLLQAISSPLLDELIGYVRKQEVLTGEAGKVQATSLA---GQVKALVDLLAGKGTQGSWALQTFIENS--DSQLCRHLA-----

```

**C****TTC3:**

```

CARD11 (4LWD)      LWENVECNRHMLSRIN--PAKLTPPYLRQCKVIDEQDEDEVLNAPMLPSKINRAGRLLDILHTKGQ--RGYVVFLESLEFY---YPELYKLVTGK
CARD8 (4IKM)      DAAFVKENHRQLQARMGDLKGVLDDLQDNEVLTENEKELVEQEKTRQ---SKNEALLSMVEKKGDLALDVLFRSISER---DPYLVSYLRQQ
MAVS (2VGQ)      TYKYICRNFSNFC--NVD--VVEILPYL---PCLTARDQDRLRATCTLSGNRDTLWHLFNTLQRRP---WVEYFIAALRGCE--LVDLADEVASV
APAF-1 (1CY5)    ARNCLLQHREALEKDIK--TSYIMDHMISDGFLTISEEEKVRNEPTQQ---QRAAMLIKMILKKDN--DSYVSFYNALLHEG--YKDLAALLHDG
NOD1 (2DBD)      HIQLLKSNRELLVTHIRNTQCLVDNLLKNDYFSAEDAEIVCACPTQP---DKVRKLLDLVQSKGE--EVSEFFLYLQQLADAYVDLRPWLLEI
TTC3             ILQCIKQYADKIKSGIQNTAMLLKELLSWKVLSTEDYTTCFSSRNFL---NEAVDYVIRHLIQENNRVKTRIELHVLSELKEVEPKLAAWIQL

```

**Figure 8: Human orthologues of NLRC5 and NLRC3 conform poorly to the conserved hydrophobic pattern.** (A) Alignment of human, mouse and zebrafish NLRC5 orthologues with other CARDs. (B) Alignment of human, mouse and platypus NLRC3 orthologues with other CARDs. (C) The putative CARD-containing protein TT3 shows conservation of the CARD hydrophobic core. In all panels residues contributing to the hydrophobic core are coloured red and presented in bold underlined text. Residues deviating from the hydrophobic core are light blue, bold and underlined. In panel B residues in the correct position to form a surface salt bridge are coloured orange (acidic), dark blue (basic) or purple (incompatible).
